# Supplementary material
Source: HighWire-hosted journal article supplement (http://www.qdcxjkg.com/highwire/filestream/113522/field_highwire_adjunct_files/0/ERJ-00425-2012_Disclosures.pdf)
Supplement: ERJ-00425-2012_Disclosures.pdf [file ERJ-00425-2012_Disclosures.pdf]

**B.B. Davis** received a Philip Morris postdoctoral fellowship in 2006–2008.

**K.E. Pinkerton** received research funding from the Phillip Morris Research Management Group from 2003 to 2007, educational funds from the American Thoracic Society to teach a postgraduate course in nanoparticle health effects, and a grant support from the National Institute for Environmental Health Sciences and the California Tobacco-Related Research Program to conduct research in models of tobacco-induced disease in rodents and non-human primates.

**T. Goldkorn** has received funding for research studies in lung injury and lung cancer from NIH-RO1 and TRDRP.
